# Supplementary material
Source: Springer Nature journal article supplement (https://www.springermedizin.de/resource/supplementary/13000_2011_495_MOESM1_ESM.pdf/9624416)

Family A

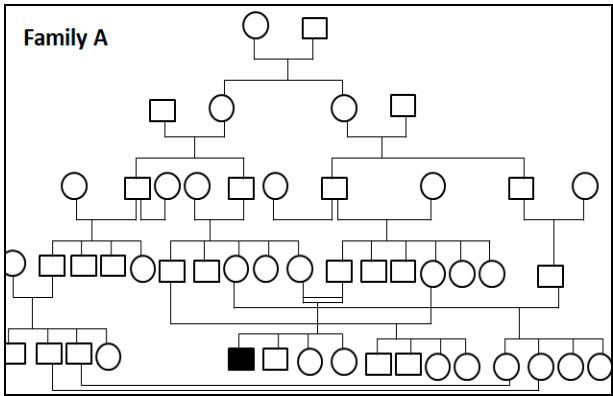

Family B

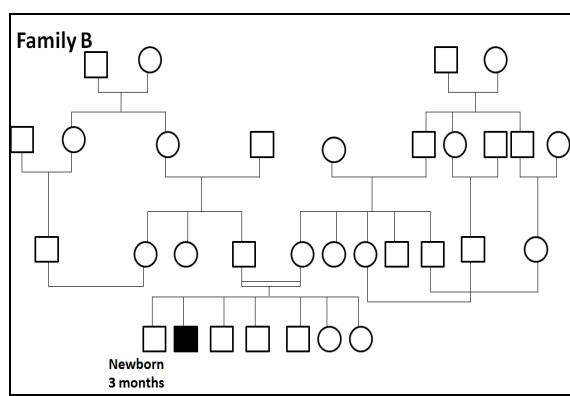

Family C

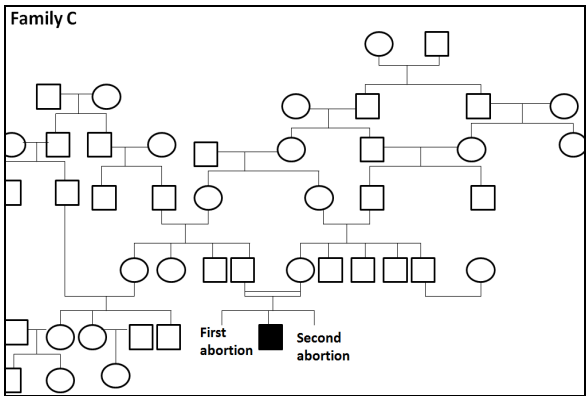

Family D

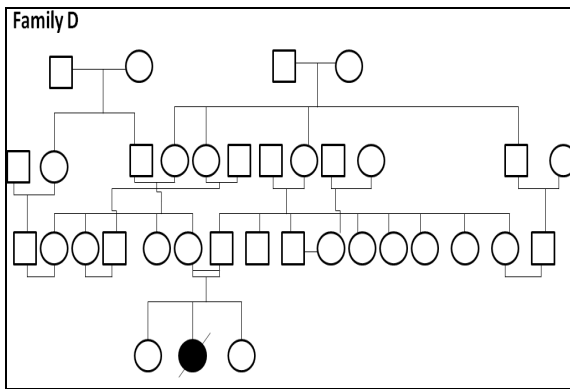

Family E

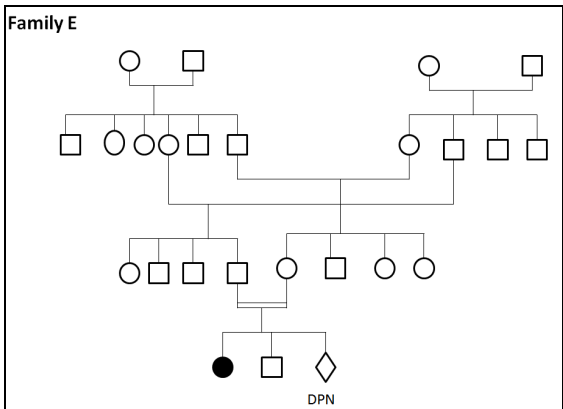

Family F

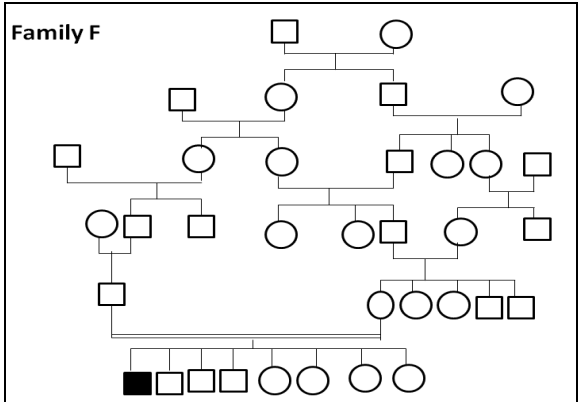

Supplement: MOESM1 [file 9624416]
